# Supplementary material
Source: publisher figshare collection journal article supplement (https://tandf.figshare.com/articles/dataset/_/8850992)
Supplement: Supplementary file 1 [file 1]

Archive with 3 entries (3 files):
- tbeq_a_1631213_sm8428.pdf
- tbeq_a_1631213_sm8360.pdf
- tbeq_a_1631213_sm8325.pdf
