# Supplementary material
Source: publisher figshare collection journal article supplement (https://tandf.figshare.com/articles/dataset/_/8850992)
Supplement: Supplementary file 1 [file 1 › tbeq_a_1631213_sm8325.pdf]

## SUPPLEMENTAL FIGURES

These supplemental figures have been provided by the authors to give readers additional information about their work.

Supplement to:

**Thermo- and salt-tolerant *Saccharomyces cerevisiae* strains isolated from fermenting coconut toddy from Sri Lanka**

Maduka Subodinee Ahangangoda Arachchige, Shusaku Yoshida and Hirohide Toyama

Biotechnol. Biotechnol. Equip. 2019, **33**

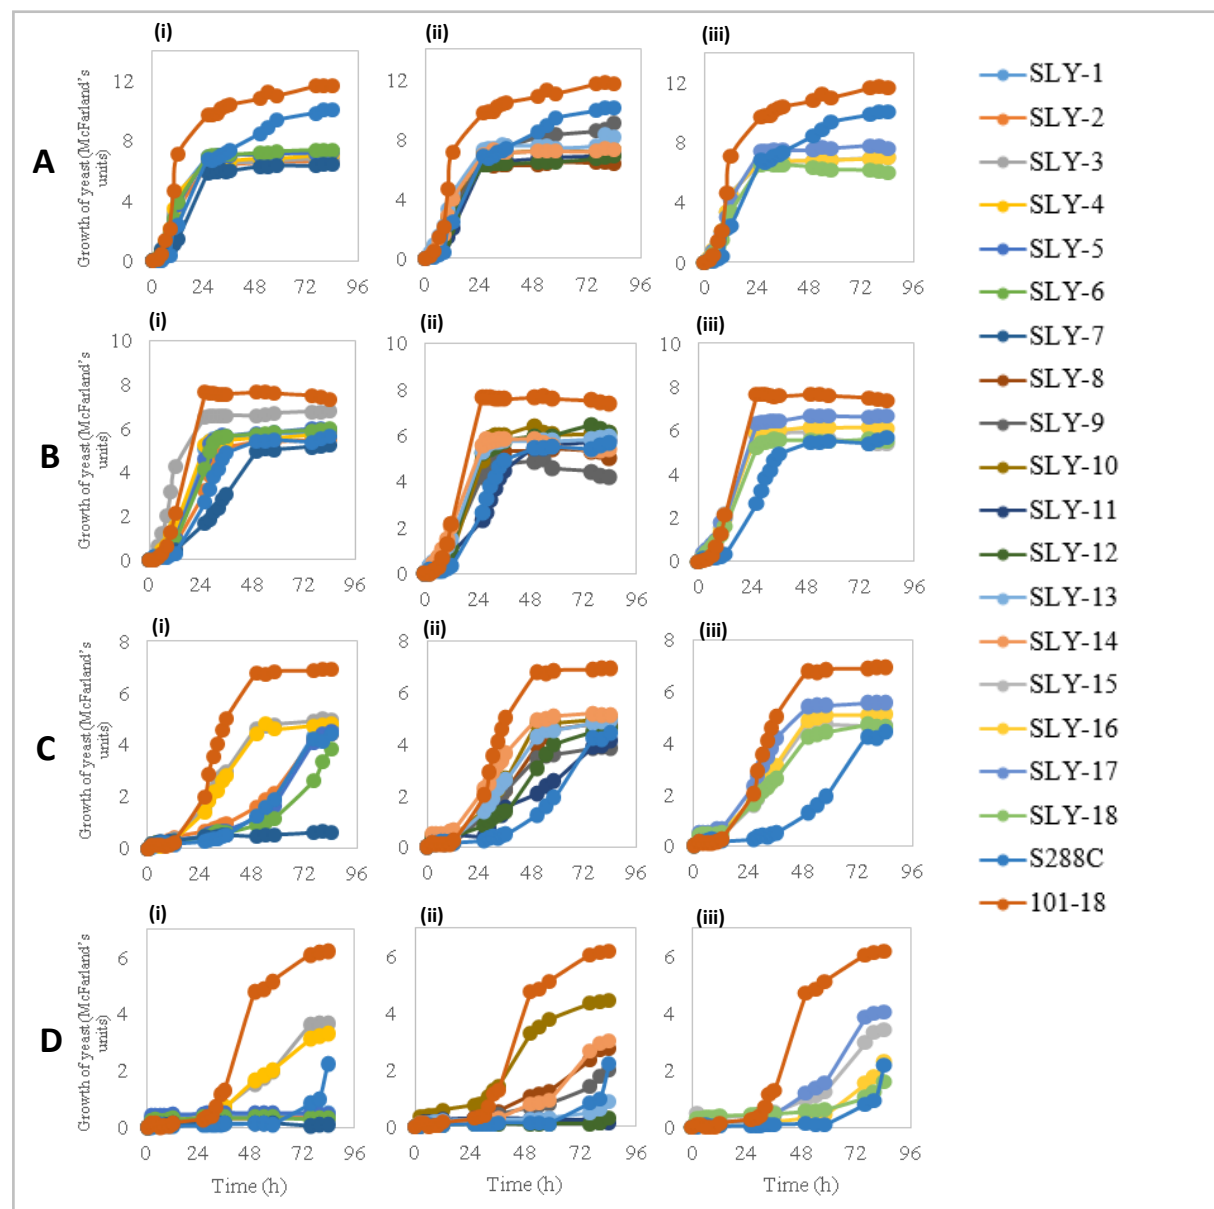

**Figure S1.** Growth of isolated *S. cerevisiae* strains in the presence of NaCl at different concentrations: 5% (A), 7.5% (B), 10% (C) and 11% (D) in YPD liquid medium.

Note: The growth of yeast strains (i) SLY-1 to SLY-7, (ii) SLY-8 to SLY-14, (iii) SLY-15 to SLY-18 of A, B, C and D was compared to two reference strains: laboratory yeast S288C and Awamori yeast 101-18 strains. Cultures were incubated while shaking the cells reciprocally (200 rpm) at 30°C.

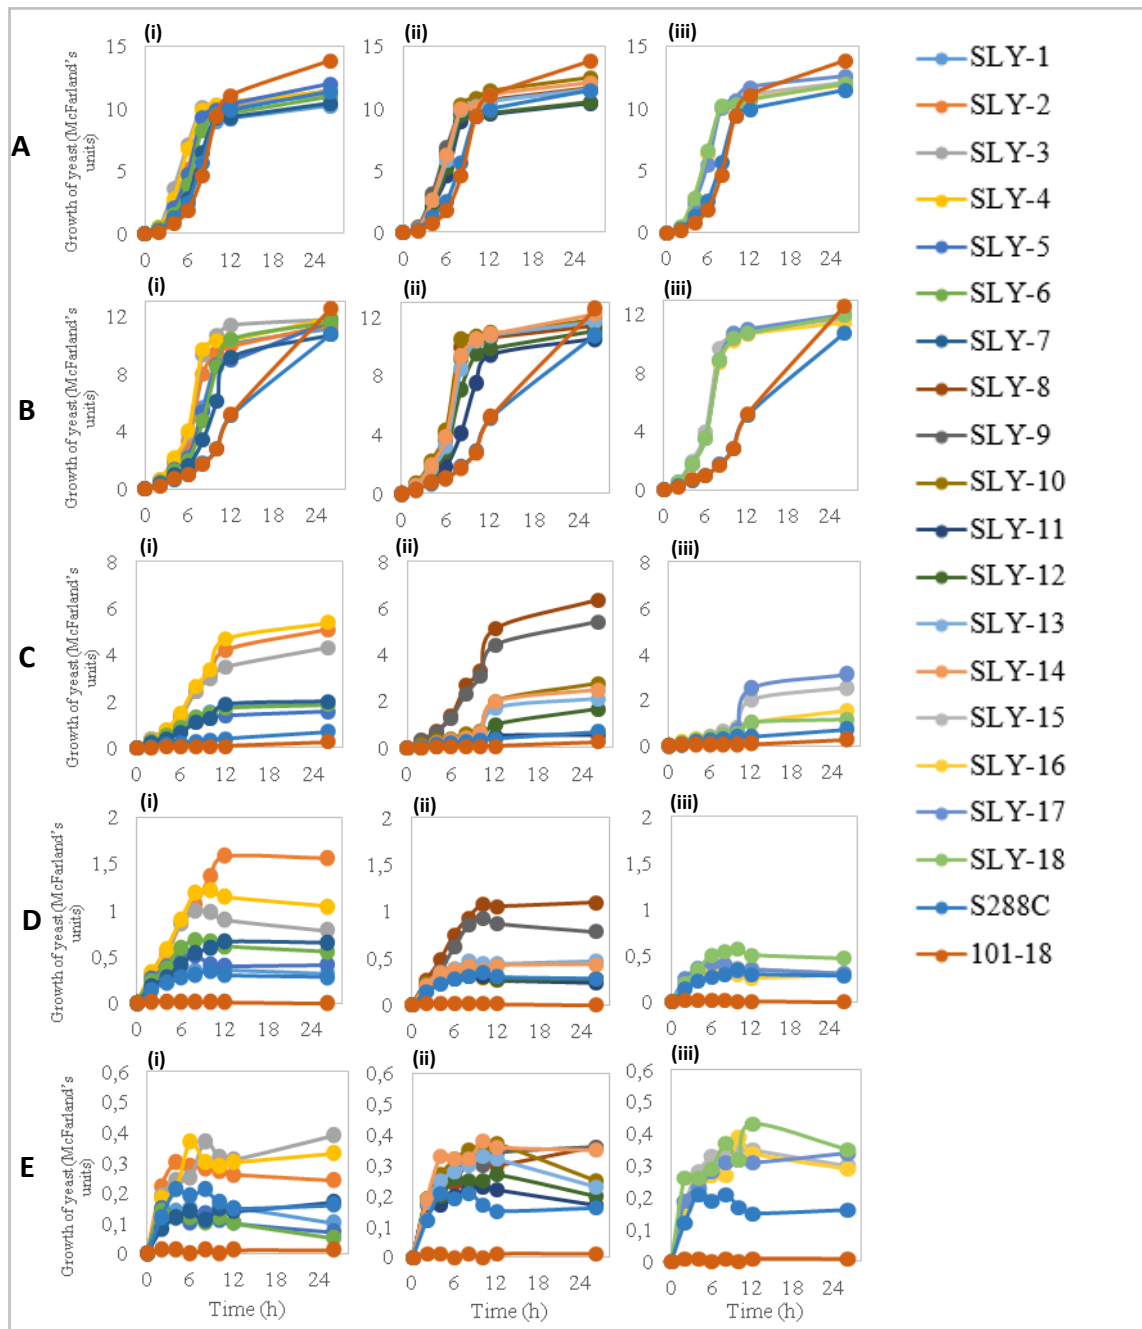

**Figure S2.** Growth of isolated *S. cerevisiae* yeast strains at different incubation temperatures: 30 °C (A), 37 °C (B), 40 °C (C), 41 °C (D) and 42 °C (E).

Note: The growth of yeast strains (i) SLY-1 to SLY-7, (ii) SLY-8 to SLY-14, (iii) SLY-15 to SLY-18 of A, B, C, D and E was compared to two reference strains: laboratory yeast S288C and Awamori yeast 101-18 strains. YPD broth cultures were incubated while shaking reciprocally (200 rpm) at 30 °C.

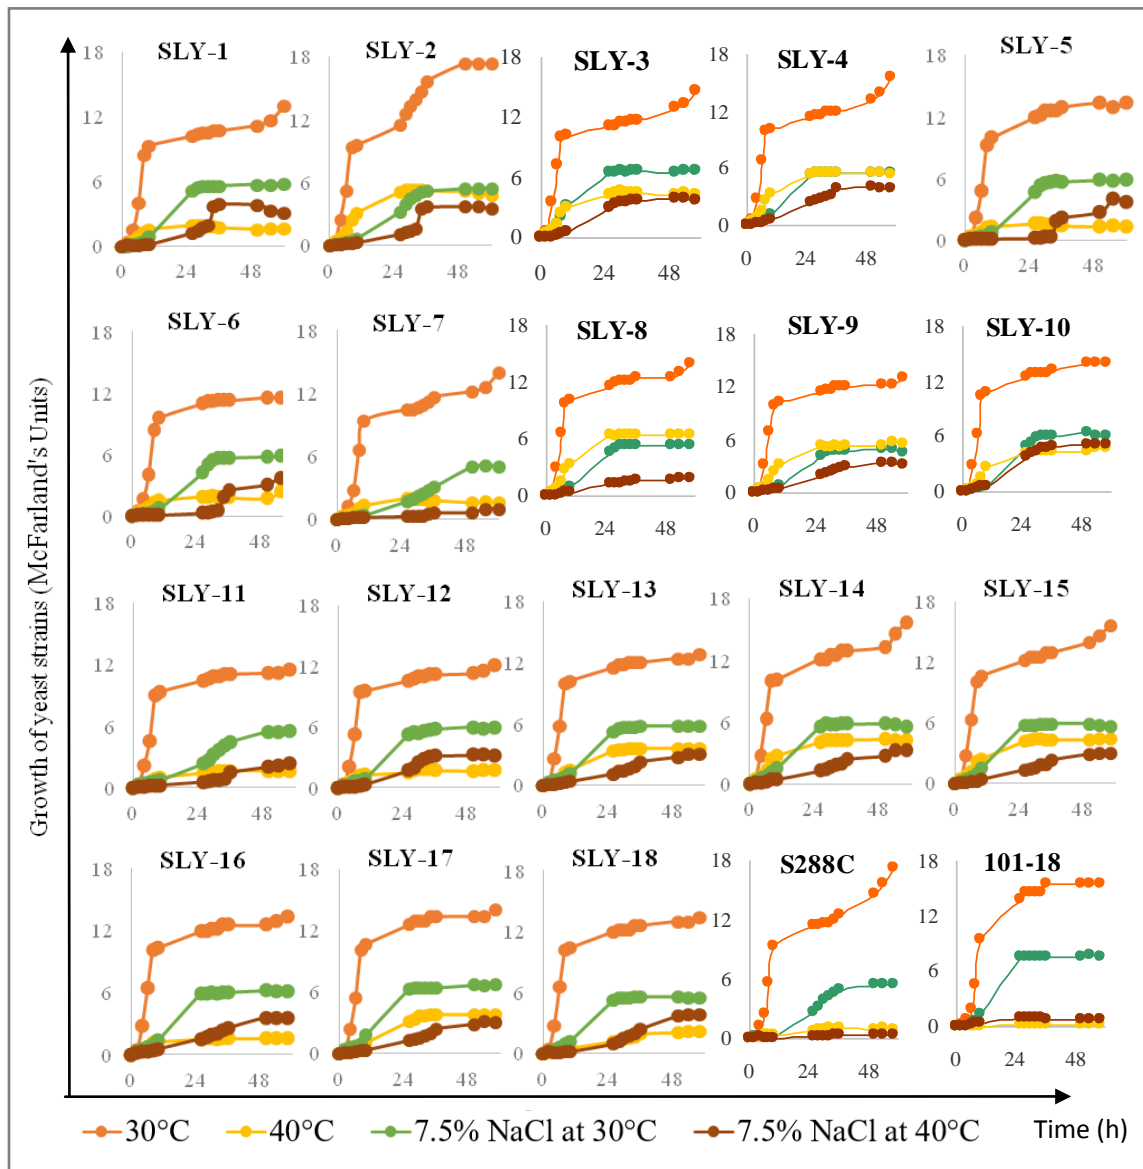

**Figure S3.** Comparison of the growth of the isolated *S. cerevisiae* strains in the presence of 7.5% NaCl in YPD medium (w/v), incubated at 30 °C (green colour line) or 40 °C (dark-brown colour line).

Note: The yeast strains were grown in YPD without addition of NaCl and incubated at 30 °C (orange colour line) or 40 °C (yellow colour line) were shown as well. All yeast culture media were incubated while shaking (reciprocally) at 200 rpm.

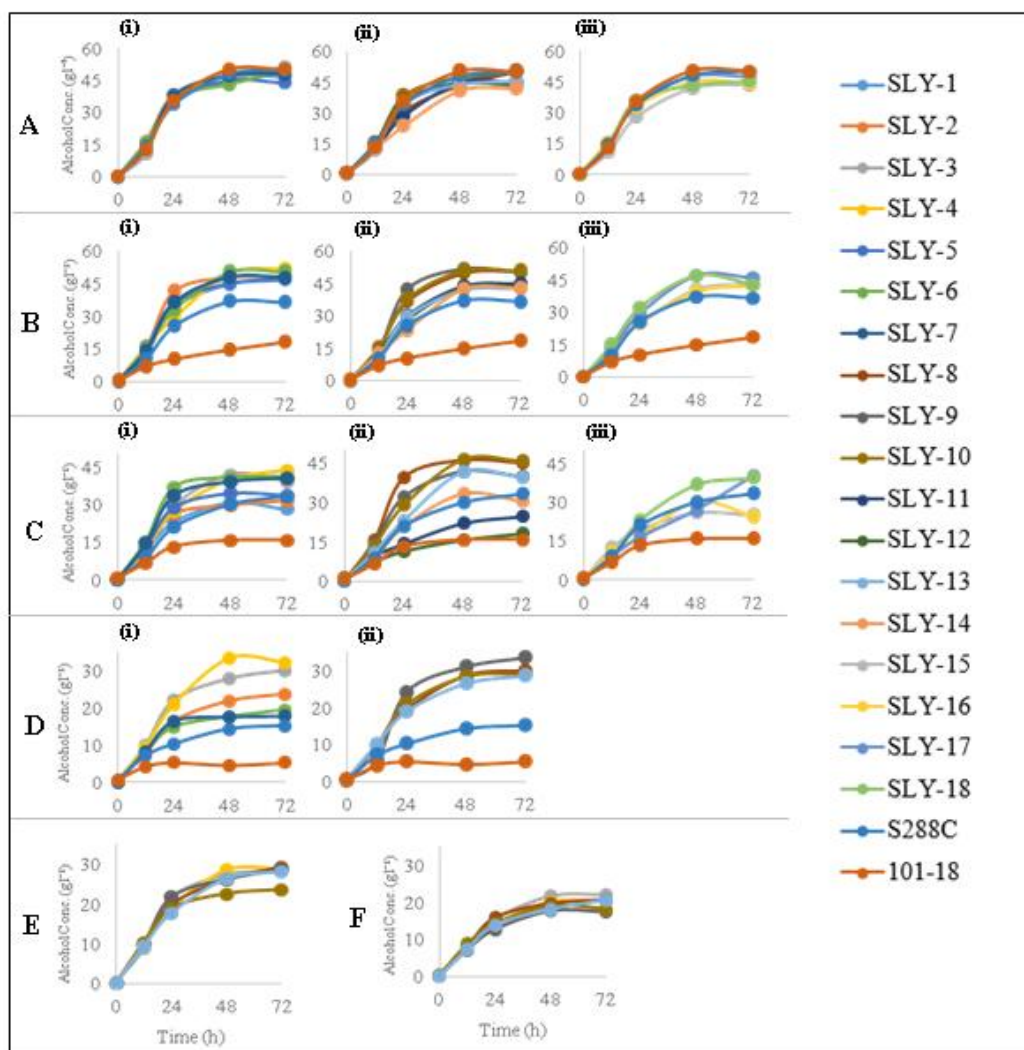

**Figure S4.** Ethanol production ( $\text{g}\cdot\text{L}^{-1}$ ) of isolated *S. cerevisiae* strains at different incubation temperatures: (i) SLY-1 to SLY-7, (ii) SLY-8 to SLY-14, (iii) SLY-15 to SLY-18 at 30 °C (A), 37 °C (B), 40 °C (C); (i) SLY-2 to SLY-4, SLY-6, SLY-7 (ii) SLY-8 to SLY-10, SLY-13 at 41 °C (D);

SLY-3, SLY-4, SLY-8 to SLY-10, SLY-13 at 42 °C (E), 43 °C (F).

Note: Fermentation was conducted in a batch fermented YPD medium (contained  $100\text{ g}\cdot\text{L}^{-1}$  glucose) under static incubation condition. Comparison of the alcohol production of each yeast strain was shown with two reference strains; laboratory yeast S288C and Awamori yeast 101-18 strains.

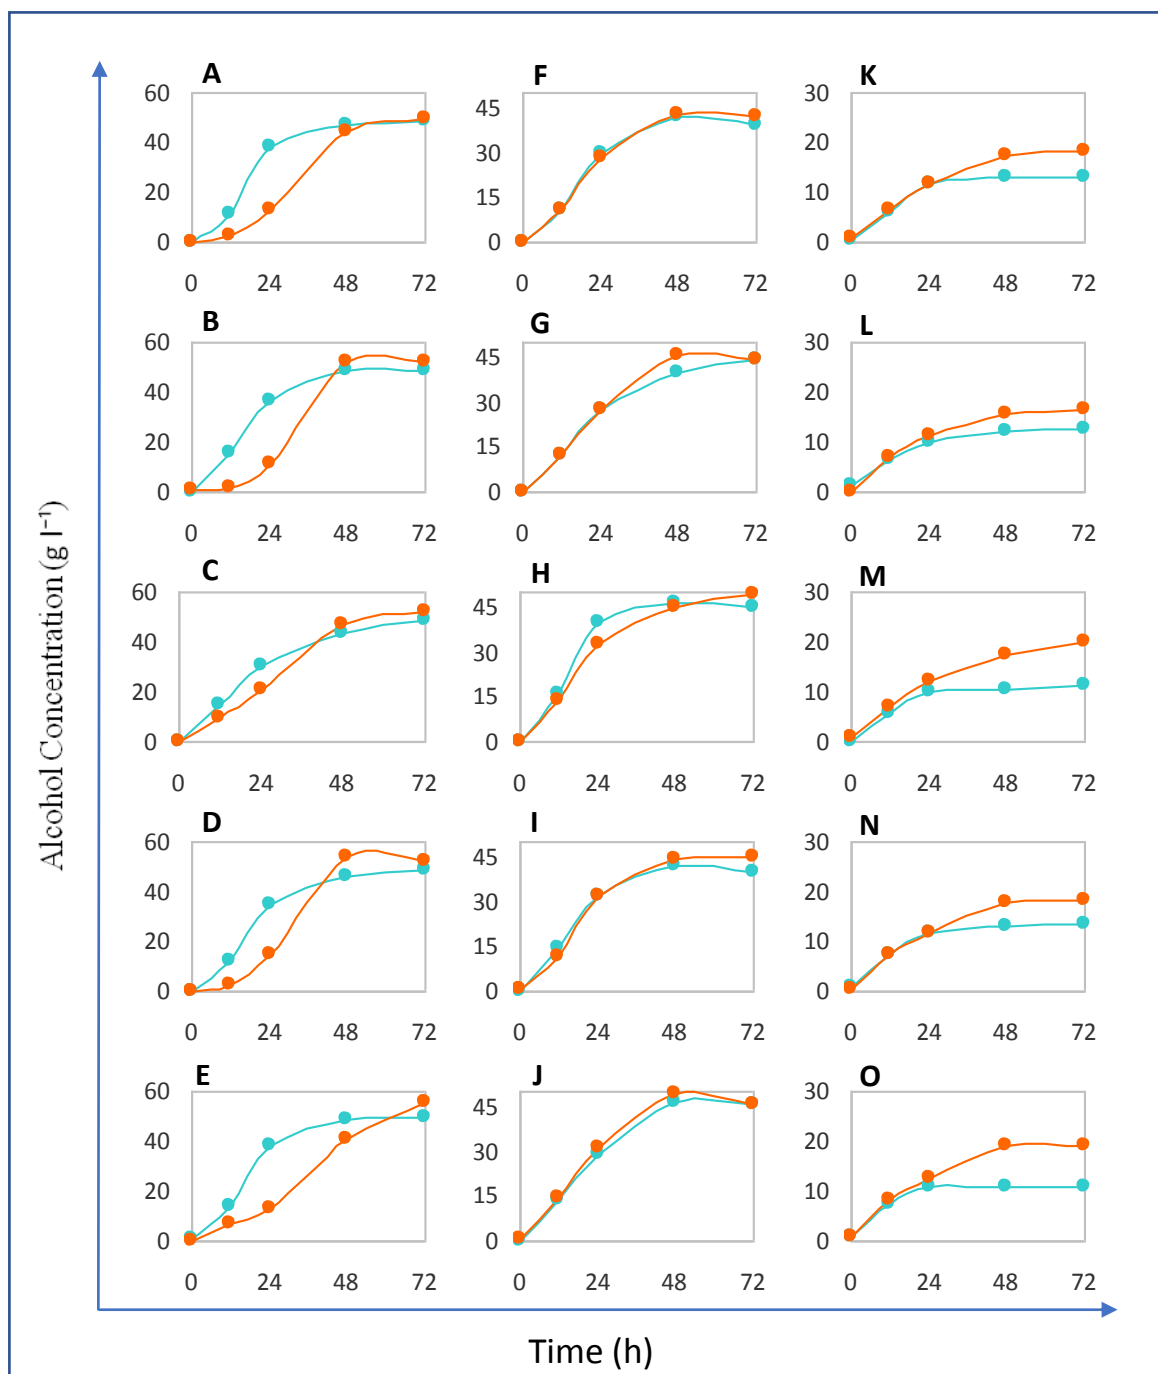

**Figure S5.** Alcohol production (g·L<sup>-1</sup>) of *S. cerevisiae* strains SLY-3 (A, F, K), SLY-4 (B, G, L), SLY-8 (C, H, M), SLY-9 (D, I, N) and SLY-10 (E, J, O) at different incubation temperatures: 30 °C (A, B, C, D, E), 40 °C (F, G, H, I, J) and 45 °C (K, L, M, N, O).

Note: Fermentation was conducted in a 100 mL batch fermented YPD medium contained glucose 100 g·L<sup>-1</sup> (sky-blue circle) and 160 g·L<sup>-1</sup> (orange colour) incubated under static condition.
