# Supplementary material
Source: publisher figshare collection journal article supplement (https://tandf.figshare.com/articles/dataset/_/8850992)
Supplement: Supplementary file 1 [file 1 › tbeq_a_1631213_sm8360.pdf]

**Table S1.** DNA sequences obtained through the PCR amplification of 26S rDNA D1/D2 region compared to that of *Saccharomyces cerevisiae*, *Pichia manshurica* and *Saccharomyces ludwigii* reference strains.

| Yeast strain | DNA sequences of 26S rDNA D1/D2 region                                                                                                                                                                                                                                                                                                                                                                                                                                                                                                                                                                                                        | Identity | Reference strain                                                                                                  |
|--------------|-----------------------------------------------------------------------------------------------------------------------------------------------------------------------------------------------------------------------------------------------------------------------------------------------------------------------------------------------------------------------------------------------------------------------------------------------------------------------------------------------------------------------------------------------------------------------------------------------------------------------------------------------|----------|-------------------------------------------------------------------------------------------------------------------|
| <b>SLY-1</b> | AAGCGGAGGAAAAGAAACCAACCGGGATTGCCTTAGTAACGGCGAGTGAAGCGGCAAAAGCTCAAATTTGAAATCTGGTACCTTCGGTGCC<br>CGAGTTGTAATTTGGAGAGGGCAACTTTGGGGCCGTTCTTGTCTATGTTCTTGGAAACAGGACGTCATAGAGGGTGAGAATCCCGTGTGGC<br>GAGGAGTGCGGTTCTTTGTAAGTGCCTTCGAAGAGTCGAGTTGTTGGGAATGCAGCTCTAAGTGGGTGGTAAATTCATCTAAAGCTAAA<br>TATTGGCGAGAGACCGATAGCGAACAAGTACAGTGATGGAAGATGAAAAGAACTTTGAAAAGAGAGTGAAAAAGTACGTGAAATTGTTGA<br>AAGGGAAGGGCATTTGATCAGACATGGTGTGTTTGTGCCCTCTGCTCCTTGTGGGTAGGGGAATCTCGCATTTCACTGGGCCAGCATCAGTTTT<br>GGTGGCAGGATAAATCCATAGGAATGTAGCTTGCCTCGGTAAGTATTATAGCCTGTGGGAATACTGCCAGCTGGGACTGAGGACTGCGACGT<br>AAGTCAAGGATGCTGGCATAATGGTTATATGCCGCCGCTCTTGACCC    | 100%     |                                                                                                                   |
| <b>SLY-2</b> | AAGCGGAGGAAAAGAAACCAACCGGGATTGCCTTAGTAACGGCGAGTGAAGCGGCAAAAGCTCAAATTTGAAATCTGGTACCTTCGGTGCC<br>CGAGTTGTAATTTGGAGAGGGCAACTTTGGGGCCGTTCTTGTCTATGTTCTTGGAAACAGGACGTCATAGAGGGTGAGAATCCCGTGTGGC<br>GAGGAGTGCGGTTCTTTGTAAGTGCCTTCGAAGAGTCGAGTTGTTGGGAATGCAGCTCTAAGTGGGTGGTAAATTCATCTAAAGCTAAA<br>TATTGGCGAGAGACCGATAGCGAACAAGTACAGTGATGGAAGATGAAAAGAACTTTGAAAAGAGAGTGAAAAAGTACGTGAAATTGTTGA<br>AAGGGAAGGGCATTTGATCAGACATGGTGTGTTTGTGCCCTCTGCTCCTTGTGGGTAGGGGAATCTCGCATTTCACTGGGCCAGCATCAGTTTT<br>GGTGGCAGGATAAATCCATAGGAATGTAGCTTGCCTCGGTAAGTATTATAGCCTGTGGGAATACTGCCAGCTGGGACTGAGGACTGCGACGT<br>AAGTCAAGGATGCTGGCATAATGGTTATATGCCGCCGCTCTTGACCC    | 100%     | <i>Saccharomyces cerevisiae</i><br>strain A44<br>(Gene bank accession No:<br>KM589478.1)<br><br>(601 nucleotides) |
| <b>SLY-3</b> | AAAAGCGGAGGAAAAGAAACCAACCGGGATTGCCTTAGTAACGGCGAGTGAAGCGGCAAAAGCTCAAATTTGAAATCTGGTACCTTCGGTG<br>CCCGAGTTGTAATTTGGAGAGGGCAACTTTGGGGCCGTTCTTGTCTATGTTCTTGGAAACAGGACGTCATAGAGGGTGAGAATCCCGTGTG<br>GCGAGGAGTGCGGTTCTTTGTAAGTGCCTTCGAAGAGTCGAGTTGTTGGGAATGCAGCTCTAAGTGGGTGGTAAATTCATCTAAAGCTA<br>AATATTGGCGAGAGACCGATAGCGAACAAGTACAGTGATGGAAGATGAAAAGAACTTTGAAAAGAGAGTGAAAAAGTACGTGAAATTGTT<br>GAAAGGGAAGGGCATTTGATCAGACATGGTGTGTTTGTGCCCTCTGCTCCTTGTGGGTAGGGGAATCTCGCATTTCACTGGGCCAGCATCAGTTT<br>TTGGTGGCAGGATAAATCCATAGGAATGTAGCTTGCCTCGGTAAGTATTATAGCCTGTGGGAATACTGCCAGCTGGGACTGAGGACTGCGAC<br>GTAAGTCAAGGATGCTGGCATAATGGTTATATGCCGCCGCTCTTGACCC | 100%     |                                                                                                                   |

|       |                                                                                                                                                                                                                                                                                                                                                                                                                                                                                                                                                                                                                                            |      |
|-------|--------------------------------------------------------------------------------------------------------------------------------------------------------------------------------------------------------------------------------------------------------------------------------------------------------------------------------------------------------------------------------------------------------------------------------------------------------------------------------------------------------------------------------------------------------------------------------------------------------------------------------------------|------|
| SLY-4 | AAGCGGAGGAAAAAGAAACCAACCGGGATTGCCTTAGTAACGGCGAGTGAAGCGGCAAAAGCTCAAATTTGAAATCTGGTACCTTCGGTGCC<br>CGAGTTGTAATTTGGAGAGGGCAACTTTGGGGCCGTTCTTGTCTATGTTCTTGGAAACAGGACGTCATAGAGGGTGAGAATCCCGTGTGGC<br>GAGGAGTGCGGTTCTTTGTAAGTGCCTTCGAAGAGTCGAGTTGTTGGGAATGCAGCTCTAAGTGGGTGGTAAATCCATCTAAAGCTAAA<br>TATTGGCGAGAGACCGATAGCGAACAAGTACAGTGATGGAAGATGAAAAGAACTTTGAAAAGAGAGTGAAAAAGTACGTGAAATTGTTGA<br>AAGGGAAGGGCATTGTATCAGACATGGTGTGTTGTGCCCTCTGCTCCTGTGGGTAGGGGAATCTCGCATTTCACTGGGCCAGCATCAGTTT<br>GGTGGCAGGATAAATCCATAGGAATGTAGCTTGCCTCGGTAAGTATTATAGCCTGTGGGAATACTGCCAGCTGGGACTGAGGACTGCGACGT<br>AAGTCAAGGATGCTGGCATAATGTTATATGCCGCCCGTCTTGACCC    | 100% |
| SLY-5 | AAAAGCGGAGGAAAAAGAAACCAACCGGGATTGCCTTAGTAACGGCGAGTGAAGCGGCAAAAGCTCAAATTTGAAATCTGGTACCTTCGGTG<br>CCCGAGTTGTAATTTGGAGAGGGCAACTTTGGGGCCGTTCTTGTCTATGTTCTTGGAAACAGGACGTCATAGAGGGTGAGAATCCCGTGTG<br>GCGAGGAGTGCGGTTCTTTGTAAGTGCCTTCGAAGAGTCGAGTTGTTGGGAATGCAGCTCTAAGTGGGTGGTAAATCCATCTAAAGCTA<br>AATATTGGCGAGAGACCGATAGCGAACAAGTACAGTGATGGAAGATGAAAAGAACTTTGAAAAGAGAGTGAAAAAGTACGTGAAATTGTT<br>GAAAGGGAAGGGCATTGTATCAGACATGGTGTGTTGTGCCCTCTGCTCCTGTGGGTAGGGGAATCTCGCATTTCACTGGGCCAGCATCAGTT<br>TTGGTGGCAGGATAAATCCATAGGAATGTAGCTTGCCTCGGTAAGTATTATAGCCTGTGGGAATACTGCCAGCTGGGACTGAGGACTGCGAC<br>GTAAGTCAAGGATGCTGGCATAATGTTATATGCCGCCCGTCTTGACCC | 100% |
| SLY-6 | AAAAGCGGAGGAAAAAGAAACCAACCGGGATTGCCTTAGTAACGGCGAGTGAAGCGGCAAAAGCTCAAATTTGAAATCTGGTACCTTCGGTG<br>CCCGAGTTGTAATTTGGAGAGGGCAACTTTGGGGCCGTTCTTGTCTATGTTCTTGGAAACAGGACGTCATAGAGGGTGAGAATCCCGTGTG<br>GCGAGGAGTGCGGTTCTTTGTAAGTGCCTTCGAAGAGTCGAGTTGTTGGGAATGCAGCTCTAAGTGGGTGGTAAATCCATCTAAAGCTA<br>AATATTGGCGAGAGACCGATAGCGAACAAGTACAGTGATGGAAGATGAAAAGAACTTTGAAAAGAGAGTGAAAAAGTACGTGAAATTGTT<br>GAAAGGGAAGGGCATTGTATCAGACATGGTGTGTTGTGCCCTCTGCTCCTGTGGGTAGGGGAATCTCGCATTTCACTGGGCCAGCATCAGTT<br>TTGGTGGCAGGATAAATCCATAGGAATGTAGCTTGCCTCGGTAAGTATTATAGCCTGTGGGAATACTGCCAGCTGGGACTGAGGACTGCGAC<br>GTAAGTCAAGGATGCTGGCATAATGTTATATGCCGCCCGTCTTG     | 100% |
| SLY-7 | AAAAGCGGAGGAAAAAGAAACCAACCGGGATTGCCTTAGTAACGGCGAGTGAAGCGGCAAAAGCTCAAATTTGAAATCTGGTACCTTCGGTG<br>CCCGAGTTGTAATTTGGAGAGGGCAACTTTGGGGCCGTTCTTGTCTATGTTCTTGGAAACAGGACGTCATAGAGGGTGAGAATCCCGTGTG<br>GCGAGGAGTGCGGTTCTTTGTAAGTGCCTTCGAAGAGTCGAGTTGTTGGGAATGCAGCTCTAAGTGGGTGGTAAATCCATCTAAAGCTA<br>AATATTGGCGAGAGACCGATAGCGAACAAGTACAGTGATGGAAGATGAAAAGAACTTTGAAAAGAGAGTGAAAAAGTACGTGAAATTGTT<br>GAAAGGGAAGGGCATTGTATCAGACATGGTGTGTTGTGCCCTCTGCTCCTGTGGGTAGGGGAATCTCGCATTTCACTGGGCCAGCATCAGTT<br>TTGGTGGCAGGATAAATCCATAGGAATGTAGCTTGCCTCGGTAAGTATTATAGCCTGTGGGAATACTGCCAGCTGGGACTGAGGACTGCGAC<br>GTAAGTCAAGGATGCTGGCATAATGTTATATGCCGCCCGTCTTGACC  | 100% |
| SLY-8 | AAAAGCGGAGGAAAAAGAAACCAACCGGGATTGCCTTAGTAACGGCGAGTGAAGCGGCAAAAGCTCAAATTTGAAATCTGGTACCTTCGGTG<br>CCCGAGTTGTAATTTGGAGAGGGCAACTTTGGGGCCGTTCTTGTCTATGTTCTTGGAAACAGGACGTCATAGAGGGTGAGAATCCCGTGTG<br>GCGAGGAGTGCGGTTCTTTGTAAGTGCCTTCGAAGAGTCGAGTTGTTGGGAATGCAGCTCTAAGTGGGTGGTAAATCCATCTAAAGCTA<br>AATATTGGCGAGAGACCGATAGCGAACAAGTACAGTGATGGAAGATGAAAAGAACTTTGAAAAGAGAGTGAAAAAGTACGTGAAATTGTT<br>GAAAGGGAAGGGCATTGTATCAGACATGGTGTGTTGTGCCCTCTGCTCCTGTGGGTAGGGGAATCTCGCATTTCACTGGGCCAGCATCAGTT<br>TTGGTGGCAGGATAAATCCATAGGAATGTAGCTTGCCTCGGTAAGTATTATAGCCTGTGGGAATACTGCCAGCTGGGACTGAGGACTGCGAC<br>GTAAGTCAAGGATGCTGGCATAATGTTATATGCCGCCCGTCTTGACC  | 100% |

*Saccharomyces cerevisiae*  
strain A44  
(Gene bank accession No:  
KM589478.1)  
  
(601 nucleotides)

|        |                                                                                                                                                                                                                                                                                                                                                                                                                                                                                                                                                                                                                                                                                                              |      |                                                                                                                                                              |
|--------|--------------------------------------------------------------------------------------------------------------------------------------------------------------------------------------------------------------------------------------------------------------------------------------------------------------------------------------------------------------------------------------------------------------------------------------------------------------------------------------------------------------------------------------------------------------------------------------------------------------------------------------------------------------------------------------------------------------|------|--------------------------------------------------------------------------------------------------------------------------------------------------------------|
| SLY-9  | <p>AAAAGCGGAGGAAAAGAAACCAACCGGGATTGCCTTAGTAACGGCGAGTGAAGCGGCAAAAGCTCAAATTTGAAATCTGGTACCTTCGGTG<br/>         CCCGAGTTGTAATTTGGAGAGGGCAACTTTGGGGCCGTTCTTGTCTATGTTCTTGGAAACAGGACGTCATAGAGGGTGAGAATCCCGTGTG<br/>         GCGAGGAGTGCGGTTCTTTGTAAGTGCCTTCGAAGAGTCGAGTTGTTTGGGAATGCAGCTCTAAGTGGGTGGTAAATTCATCTAAAGCTA<br/>         AATATTGGCGAGAGACCGATAGCGAACAAGTACAGTGATGGAAAGATGAAAAGAACTTTGAAAAGAGAGTGAAAAAGTACGTGAAATTGTT<br/>         GAAAGGGAAGGGCATTGATCAGACATGGTGTTTGTGCCCTCTGCTCCTTGTGGGTAGGGGAATCTCGCATTTCACTGGGCCAGCATCAGTT<br/>         TTGGTGGCAGGATAAATCCATAGGAATGTAGCTTGCCTCGGTAAGTATTATAGCCTGTGGGAATACTGCCAGCTGGGACTGAGGACTGCGAC<br/>         GTAAGTCAAGGATGCTGGCATAATGTTATATGCCGCCCGTCTTGACC</p> | 100% |                                                                                                                                                              |
| SLY-10 | <p>AAAAGCGGAGGAAAAGAAACCAACCGGGATTGCCTTAGTAACGGCGAGTGAAGCGGCAAAAGCTCAAATTTGAAATCTGGTACCTTCGGTG<br/>         CCCGAGTTGTAATTTGGAGAGGGCAACTTTGGGGCCGTTCTTGTCTATGTTCTTGGAAACAGGACGTCATAGAGGGTGAGAATCCCGTGTG<br/>         GCGAGGAGTGCGGTTCTTTGTAAGTGCCTTCGAAGAGTCGAGTTGTTTGGGAATGCAGCTCTAAGTGGGTGGTAAATTCATCTAAAGCTA<br/>         AATATTGGCGAGAGACCGATAGCGAACAAGTACAGTGATGGAAAGATGAAAAGAACTTTGAAAAGAGAGTGAAAAAGTACGTGAAATTGTT<br/>         GAAAGGGAAGGGCATTGATCAGACATGGTGTTTGTGCCCTCTGCTCCTTGTGGGTAGGGGAATCTCGCATTTCACTGGGCCAGCATCAGTT<br/>         TTGGTGGCAGGATAAATCCATAGGAATGTAGCTTGCCTCGGTAAGTATTATAGCCTGTGGGAATACTGCCAGCTGGGACTGAGGACTGCGAC<br/>         GTAAGTCAAGGATGCTGGCATAATGTTATATGCCGCCCGTCTTGA</p>   | 100% |                                                                                                                                                              |
| SLY-11 | <p>AAAAGCGGAGGAAAAGAAACCAACCGGGATTGCCTTAGTAACGGCGAGTGAAGCGGCAAAAGCTCAAATTTGAAATCTGGTACCTTCGGTG<br/>         CCCGAGTTGTAATTTGGAGAGGGCAACTTTGGGGCCGTTCTTGTCTATGTTCTTGGAAACAGGACGTCATAGAGGGTGAGAATCCCGTGTG<br/>         GCGAGGAGTGCGGTTCTTTGTAAGTGCCTTCGAAGAGTCGAGTTGTTTGGGAATGCAGCTCTAAGTGGGTGGTAAATTCATCTAAAGCTA<br/>         AATATTGGCGAGAGACCGATAGCGAACAAGTACAGTGATGGAAAGATGAAAAGAACTTTGAAAAGAGAGTGAAAAAGTACGTGAAATTGTT<br/>         GAAAGGGAAGGGCATTGATCAGACATGGTGTTTGTGCCCTCTGCTCCTTGTGGGTAGGGGAATCTCGCATTTCACTGGGCCAGCATCAGTT<br/>         TTGGTGGCAGGATAAATCCATAGGAATGTAGCTTGCCTCGGTAAGTATTATAGCCTGTGGGAATACTGCCAGCTGGGACTGAGGACTGCGAC<br/>         GTAAGTCAAGGATGCTGGCATAATGTTATATGCCGCCCGTCTTGA</p>   | 100% |                                                                                                                                                              |
| SLY-12 | <p>AAAAGCGGAGGAAAAGAAACCAACCGGGATTGCCTTAGTAACGGCGAGTGAAGCGGCAAAAGCTCAAATTTGAAATCTGGTACCTTCGGTG<br/>         CCCGAGTTGTAATTTGGAGAGGGCAACTTTGGGGCCGTTCTTGTCTATGTTCTTGGAAACAGGACGTCATAGAGGGTGAGAATCCCGTGTG<br/>         GCGAGGAGTGCGGTTCTTTGTAAGTGCCTTCGAAGAGTCGAGTTGTTTGGGAATGCAGCTCTAAGTGGGTGGTAAATTCATCTAAAGCTA<br/>         AATATTGGCGAGAGACCGATAGCGAACAAGTACAGTGATGGAAAGATGAAAAGAACTTTGAAAAGAGAGTGAAAAAGTACGTGAAATTGTT<br/>         GAAAGGGAAGGGCATTGATCAGACATGGTGTTTGTGCCCTCTGCTCCTTGTGGGTAGGGGAATCTCGCATTTCACTGGGCCAGCATCAGTT<br/>         TTGGTGGCAGGATAAATCCATAGGAATGTAGCTTGCCTCGGTAAGTATTATAGCCTGTGGGAATACTGCCAGCTGGGACTGAGGACTGCGAC<br/>         GTAAGTCAAGGATGCTGGCATAATGTTATATGCCGCCCGTCTTGA</p>   | 100% | <p><i>Saccharomyces cerevisiae</i><br/>         strain A44<br/>         (Gene bank accession No:<br/>         KM589478.1)<br/>         (601 nucleotides)</p> |
| SLY-13 | <p>AAGCGGAGGAAAAGAAACCAACCGGGATTGCCTTAGTAACGGCGAGTGAAGCGGCAAAAGCTCAAATTTGAAATCTGGTACCTTCGGTGCC<br/>         CGAGTTGTAATTTGGAGAGGGCAACTTTGGGGCCGTTCTTGTCTATGTTCTTGGAAACAGGACGTCATAGAGGGTGAGAATCCCGTGTGGC<br/>         GAGGAGTGCGGTTCTTTGTAAGTGCCTTCGAAGAGTCGAGTTGTTTGGGAATGCAGCTCTAAGTGGGTGGTAAATTCATCTAAAGCTAAA<br/>         TATTGGCGAGAGACCGATAGCGAACAAGTACAGTGATGGAAAGATGAAAAGAACTTTGAAAAGAGAGTGAAAAAGTACGTGAAATTGTTGA<br/>         AAGGGAAGGGCATTGATCAGACATGGTGTTTGTGCCCTCTGCTCCTTGTGGGTAGGGGAATCTCGCATTTCACTGGGCCAGCATCAGTTT<br/>         GGTGGCAGGATAAATCCATAGGAATGTAGCTTGCCTCGGTAAGTATTATAGCCTGTGGGAATACTGCCAGCTGGGACTGAGGACTGCGACGT<br/>         AAGTCAAGGATGCTGGCATAATGTTATATGCCGCCCGTCTTGACC</p>    | 100% |                                                                                                                                                              |

|        |                                                                                                                                                                                                                                                                                                                                                                                                                                                                                                                                                                                                                                                              |      |                                                                                                                                    |
|--------|--------------------------------------------------------------------------------------------------------------------------------------------------------------------------------------------------------------------------------------------------------------------------------------------------------------------------------------------------------------------------------------------------------------------------------------------------------------------------------------------------------------------------------------------------------------------------------------------------------------------------------------------------------------|------|------------------------------------------------------------------------------------------------------------------------------------|
| SLY-14 | <p>AAAAGCGGAGGAAAAGAAACCAACCGGGATTGCCTTAGTAACGGCGAGTGAAGCGGCAAAAGCTCAAATTTGAAATCTGGTACCTTCGGTG<br/> CCCGAGTTGTAATTTGGAGAGGGCAACTTTGGGGCCGTTCTTGTCTATGTTCTTGGAACAGGACGTCATAGAGGGTGAGAATCCCGTGTG<br/> GCGAGGAGTGCGGTTCTTTGTAAGTGCCTTCGAAGAGTCGAGTTGTTTGGGAATGCAGCTCTAAGTGGGTGGTAAATCCATCTAAAGCTA<br/> AATATTGGCGAGAGACCGATAGCGAACAAGTACAGTGATGGAAAGATGAAAAGAAGCTTTGAAAAGAGAGTGAAAAAGTACGTGAAATTGTT<br/> GAAAGGGAAGGGCATTGATCAGACATGGTGTGTTTGTGCCCTCTGCTCCTTGTGGGTAGGGGAATCTCGCATTTCACTGGGCCAGCATCAGTT<br/> TTGGTGGCAGGATAAATCCATAGGAATGTAGCTTGCCTCGGTAAGTATTATAGCCTGTGGGAATACTGCCAGCTGGGACTGAGGACTGCGAC<br/> GTAAGTCAAGGATGCTGGCATAATGTTATATGCCGCCCGTCTT</p>   | 100% |                                                                                                                                    |
| SLY-15 | <p>AAAAGCGGAGGAAAAGAAACCAACCGGGATTGCCTTAGTAACGGCGAGTGAAGCGGCAAAAGCTCAAATTTGAAATCTGGTACCTTCGGTG<br/> CCCGAGTTGTAATTTGGAGAGGGCAACTTTGGGGCCGTTCTTGTCTATGTTCTTGGAACAGGACGTCATAGAGGGTGAGAATCCCGTGTG<br/> GCGAGGAGTGCGGTTCTTTGTAAGTGCCTTCGAAGAGTCGAGTTGTTTGGGAATGCAGCTCTAAGTGGGTGGTAAATCCATCTAAAGCTA<br/> AATATTGGCGAGAGACCGATAGCGAACAAGTACAGTGATGGAAAGATGAAAAGAAGCTTTGAAAAGAGAGTGAAAAAGTACGTGAAATTGTT<br/> GAAAGGGAAGGGCATTGATCAGACATGGTGTGTTTGTGCCCTCTGCTCCTTGTGGGTAGGGGAATCTCGCATTTCACTGGGCCAGCATCAGTT<br/> TTGGTGGCAGGATAAATCCATAGGAATGTAGCTTGCCTCGGTAAGTATTATAGCCTGTGGGAATACTGCCAGCTGGGACTGAGGACTGCGAC<br/> GTAAGTCAAGGATGCTGGCATAATGTTATATGCCGCCCGTCTTGA</p> | 100% |                                                                                                                                    |
| SLY-16 | <p>GCGGAGGAAAAGAAACCAACCGGGATTGCCTTAGTAACGGCGAGTGAAGCGGCAAAAGCTCAAATTTGAAATCTGGTACCTTCGGTGCCCG<br/> AGTTGTAATTTGGAGAGGGCAACTTTGGGGCCGTTCTTGTCTATGTTCTTGGAACAGGACGTCATAGAGGGTGAGAATCCCGTGTGGCGA<br/> GGAGTGCGGTTCTTTGTAAGTGCCTTCGAAGAGTCGAGTTGTTTGGGAATGCAGCTCTAAGTGGGTGGTAAATCCATCTAAAGCTAAATAT<br/> TGCGCAGAGACCGATAGCGAACAAGTACAGTGATGGAAAGATGAAAAGAAGCTTTGAAAAGAGAGTGAAAAAGTACGTGAAATTGTTGAAA<br/> GGGAAGGGCATTGATCAGACATGGTGTGTTTGTGCCCTCTGCTCCTTGTGGGTAGGGGAATCTCGCATTTCACTGGGCCAGCATCAGTTTGG<br/> TGGCAGGATAAATCCATAGGAATGTAGCTTGCCTCGGTAAGTATTATAGCCTGTGGGAATACTGCCAGCTGGGACTGAGGACTGCGACGTAA<br/> GTCAAGGATGCTGGCATAATGTTATATGCCGCCCGTCTTGA</p>      | 100% |                                                                                                                                    |
| SLY-17 | <p>GCGGAGGAAAAGAAACCAACCGGGATTGCCTTAGTAACGGCGAGTGAAGCGGCAAAAGCTCAAATTTGAAATCTGGTACCTTCGGTGCCCG<br/> AGTTGTAATTTGGAGAGGGCAACTTTGGGGCCGTTCTTGTCTATGTTCTTGGAACAGGACGTCATAGAGGGTGAGAATCCCGTGTGGCGA<br/> GGAGTGCGGTTCTTTGTAAGTGCCTTCGAAGAGTCGAGTTGTTTGGGAATGCAGCTCTAAGTGGGTGGTAAATCCATCTAAAGCTAAATAT<br/> TGCGCAGAGACCGATAGCGAACAAGTACAGTGATGGAAAGATGAAAAGAAGCTTTGAAAAGAGAGTGAAAAAGTACGTGAAATTGTTGAAA<br/> GGGAAGGGCATTGATCAGACATGGTGTGTTTGTGCCCTCTGCTCCTTGTGGGTAGGGGAATCTCGCATTTCACTGGGCCAGCATCAGTTTGG<br/> TGGCAGGATAAATCCATAGGAATGTAGCTTGCCTCGGTAAGTATTATAGCCTGTGGGAATACTGCCAGCTGGGACTGAGGACTGCGACGTAA<br/> GTCAAGGATGCTGGCATAATGTTATATGCCGCCCGTCTTGA</p>      | 100% | <p><i>Saccharomyces cerevisiae</i><br/> strain A44<br/> (Gene bank accession No:<br/> KM589478.1)<br/> <br/> (601 nucleotides)</p> |
| SLY-18 | <p>AAAGCGGAGGAAAAGAAACCAACCGGGATTGCCTTAGTAACGGCGAGTGAAGCGGCAAAAGCTCAAATTTGAAATCTGGTACCTTCGGTG<br/> CCGAGTTGTAATTTGGAGAGGGCAACTTTGGGGCCGTTCTTGTCTATGTTCTTGGAACAGGACGTCATAGAGGGTGAGAATCCCGTGTG<br/> CGAGGAGTGCGGTTCTTTGTAAGTGCCTTCGAAGAGTCGAGTTGTTTGGGAATGCAGCTCTAAGTGGGTGGTAAATCCATCTAAAGCTAA<br/> ATATTGGCGAGAGACCGATAGCGAACAAGTACAGTGATGGAAAGATGAAAAGAAGCTTTGAAAAGAGAGTGAAAAAGTACGTGAAATTGTTG<br/> AAAGGGAAGGGCATTGATCAGACATGGTGTGTTTGTGCCCTCTGCTCCTTGTGGGTAGGGGAATCTCGCATTTCACTGGGCCAGCATCAGTT<br/> TGGTGGCAGGATAAATCCATAGGAATGTAGCTTGCCTCGGTAAGTATTATAGCCTGTGGGAATACTGCCAGCTGGGACTGAGGACTGCGACG<br/> TAAGTCAAGGATGCTGGCATAATGTTATATGCCGCCCGTCTTGACCC</p>  | 100% |                                                                                                                                    |

|        |                                                                                                                                                                                                                                                                                                                                                                                                                                                                                                                                                                                             |      |                                                                                                               |
|--------|---------------------------------------------------------------------------------------------------------------------------------------------------------------------------------------------------------------------------------------------------------------------------------------------------------------------------------------------------------------------------------------------------------------------------------------------------------------------------------------------------------------------------------------------------------------------------------------------|------|---------------------------------------------------------------------------------------------------------------|
| SLY-19 | ATGCCAGTAGCGGCGAGTGAAGCGGCAGAGCTCAGATTTGAAATCGTGTTTGGCACGAGTTGTAGAGTGTAGGCGGGAGTCTCTGTGGA<br>GCGCGGTGTCCAAGTCCCTTGGAACAGGGTGCTGAGAGGGTGAGAGCCCCGTAGGGTGCTGCGCGAAGCTTTGAGGCCCTGCTGACGAG<br>TCGAGTTGTTTGGGAATGCAGCTCCAAGCGGGTGGTAAATTCATCTAAGGCTAAATATTGGCGAGAGACCGATAGCGAACAAGTACTGTGA<br>AGGAAAGATGAAAAGCACTTTGAAAAGAGAGTGAAACAGCACGTGAAATTGTTGAAAGGGAAGGGTATTGGGCTCGACATGAGGGGTGCG<br>CACCGCTGTCTTGTAGGCGGCGCTCTGGGCGCCCTCTGGGCCAGCATCGGTTCTGCTGCGGGAGAAGGGGCTCCGAAAAGTGGCTCTTC<br>GGAGTGTATAGCCGGGGCCAGATGCCGCGTGTGGGACCGAGGACTGCGGCTTCTGTCTCGGATGCTGGCATAACGGCGCAATACCGCCC<br>GTCTTGA    | 99%  | <i>Pichia manshurica</i> strain<br>SHB_06<br>(Gene bank accession No:<br>KF268292.1)<br><br>(553 nucleotides) |
| SLY-20 | ATGACCAGTAGCGGCGAGTGAAGCGGCAGAGCTCAGATTTGAAATCGTGTTTCGGCACGAGTTGTAGAGTGTAGGCGGGAGTCTCTGTGGAG<br>CAGCGGTGTCCAAGTCCCTTGGAACAGGGTGCTGAGAGGGTGAGAGCCCCGTAGGGTGCTGCGCGAAGCTTTGAGGCCCTGCTGACGAGT<br>CGAGTTGTTTGGGAATGCAGCTCCAAGCGGGTGGTAAATTCATCTAAGGCTAAATATTGGCGAGAGACCGATAGCGAACAAGTACTGTGAA<br>GGAAAGATGAAAAGCACTTTGAAAAGAGAGTGAAACAGCACGTGAAATTGTTGAAAGGGAAGGGTATTGGGCTCGACATGGGGGGTGCGC<br>ACCGCTGTCTTGTAGGCGGCGCTCTGGGCGCCCTCTGGGCCAGCATCGGTTCTGCTGCGGGAGAAGGGGCTCCGAAAAGTGGCTCTTCG<br>GAGTGTATAGCCGGGGCCAGATGCCGCGTGTGGGACCGAGGACTGCGGCTTCTGTCTCGGATGCTGGCATAACGGCGCAATACCGCCCG<br>TCTTGA | 100% |                                                                                                               |
| SLY-21 | TGCCAGTAGCGGCGAGTGAAGCGGCAGAGCTCAGATTTGAAATCGTGTTTCGGCACGAGTTGTAGAGTGTAGGCGGGAGTCTCTGTGGAG<br>CAGCGGTGTCCAAGTCCCTTGGAACAGGGTGCTGAGAGGGTGAGAGCCCCGTAGGGTGCTGCGCGAAGCTTTGAGGCCCTGCTGACGAGT<br>CGAGTTGTTTGGGAATGCAGCTCCAAGCGGGTGGTAAATTCATCTAAGGCTAAATATTGGCGAGAGACCGATAGCGAACAAGTACTGTGAA<br>GGAAAGATGAAAAGCACTTTGAAAAGAGAGTGAAACAGCACGTGAAATTGTTGAAAGGGAAGGGTATTGGGCTCGACATGGGGGGTGCGC<br>ACCGCTGTCTTGTAGGCGGCGCTCTGGGCGCCCTCTGGGCCAGCATCGGTTCTGCTGCGGGAGAAGGGGCTCCGAAAAGTGGCTCTTCG<br>GAGTGTATAGCCGGGGCCAGATGCCGCGTGTGGGACCGAGGACTGCGGCTTCTGTCTCGGATGCTGGCATAACGGCGCAATACCGCCCG<br>TCTTGA   | 99%  |                                                                                                               |
| SLY-22 | GTAGCGGCGAGTGAAGCGGCAGAGCTCAGATTTGAAATCGTGTTTCGGCACGAGTTGTAGAGTGTAGGCGGGAGTCTCTGTGGAGCGCGGTG<br>TCCAAGTCCCTTGGAACAGGGTGCTGAGAGGGTGAGAGCCCCGTAGGGTGCTGCGCGAAGCTTTGAGGCCCTGCTGACGAGTCAAGTTG<br>TTTGGGAATGCAGCTCCAAGCGGGTGGTAAATTCATCTAAGGCTAAATATTGGCGAGAGACCGATAGCGAACAAGTACTGTGAAGGAAAG<br>ATGAAAAGCACTTTGAAAAGAGAGTGAAACAGCACGTGAAATTGTTGAAAGGGAAGGGTATTGGGCTCGACATGGGGGGTGCGCACCGCT<br>GTCTCTTGTAGGCGGCGCTCTGGGCGCCCTCTGGGCCAGCATCGGTTCTGCTGCGGGAGAAGGGGCTCCGAAAAGTGGCTCTTCGGAGTGT<br>TATAGCCGGGGCCAGATGCCGCGTGTGGGACCGAGGACTGCGGCTTCTGTCTCGGATGCTGGCATAACGGCGCAATACCGCCCGTCTTGA          | 100% | <i>Pichia manshurica</i> strain<br>SHB_06<br>(Gene bank accession No:<br>KF268292.1)<br><br>(553 nucleotides) |
| SLY-23 | GTAGCGGCGAGTGAAGCGGCAGAGCTCAGATTTGAAATCGTGTTTCGGCACGAGTTGTAGAGTGTAGGCGGGAGTCTCTGTGGAGCGCGGTG<br>TCCAAGTCCCTTGGAACAGGGTGCTGAGAGGGTGAGAGCCCCGTAGGGTGCTGCGCGAAGCTTTGAGGCCCTGCTGACGAGTCAAGTTG<br>TTTGGGAATGCAGCTCCAAGCGGGTGGTAAATTCATCTAAGGCTAAATATTGGCGAGAGACCGATAGCGAACAAGTACTGTGAAGGAAAG<br>ATGAAAAGCACTTTGAAAAGAGAGTGAAACAGCACGTGAAATTGTTGAAAGGGAAGGGTATTGGGCTCGACATGGGGGGTGCGCACCGCT<br>GTCTCTTGTAGGCGGCGCTCTGGGCGCCCTCTGGGCCAGCATCGGTTCTGCTGCGGGAGAAGGGGCTCCGAAAAGTGGCTCTTCGGAGTGT<br>TATAGCCGGGGCCAGATGCCGCGTGTGGGACCGAGGACTGCGGCTTCTGTCTCGGATGCTGGCATAACGGCGCAATACCGCCCGTCTTGA          | 100% |                                                                                                               |

|        |                                                                                                                                                                                                                                                                                                                                                                                                                                                                                                                                                                                                              |      |                                                                                                                   |
|--------|--------------------------------------------------------------------------------------------------------------------------------------------------------------------------------------------------------------------------------------------------------------------------------------------------------------------------------------------------------------------------------------------------------------------------------------------------------------------------------------------------------------------------------------------------------------------------------------------------------------|------|-------------------------------------------------------------------------------------------------------------------|
| SLY-24 | CCAGTAGCGGCGAGTGAAGCGGCAGAGCTCAGATTTGAAATCGTGTTCGGCACGAGTTGTAGAGTGTAGGCGGGAGTCTCTGTGGAGCGC<br>GGTGTCGAAGTCCCTTGGAACAGGGTGCCTGAGAGGGTGAGAGCCCCGTAGGGTGCTGCGCGAAGCTTTGAGGCCCTGCTGACGAGTCGA<br>GTTGTTTGGGAATGCAGCTCCAAGCGGGTGGTAAATCCATCTAAGGCTAAATATTGGCGAGAGACCGATAGCGAACAAGTACTGTGAAGG<br>AAAGATGAAAAGCACTTTGAAAAGAGAGTGAACAGCACGTGAAATTGTTGAAAGGGAAGGGTATTGGGCTCGACATGGGGGGTGCAC<br>CGCTGTCTCTTGTAGGCGGCGCTCTGGGCGCCCTCTGGGCCAGCATCGGTTCTGCTGCGGGAGAAGGGGCTCCGGAAGTGGCTCTTCGGA<br>GTGTTATAGCCGGGGCCAGATGCCGCGTGTGGGGACCGAGGACTGCGGCTTCTGTCTCGGATGCTGGCATAACGGCGCAATACCGCCCGTCT<br>TGA                       | 99%  |                                                                                                                   |
| SLY-25 | CCTAGTACGGCGAGTGAGCGGCAAAAGCTCAAATTTGAAATCTGGCATCTTTGATGTCCGAGTTGTAATTTGAAGAGGTTACTTTGGAGGCTG<br>GCTCTTGTCTATGTTCCCTTGGAACAGGACGTCATGGAGGGTGAGAATCCCGTCTGGCGAGAGTTTCAGTTTCTATGTAAAGTAGCATTTCGACG<br>AGTCGAGTTGTTTGGGAATGCAGCTCAAAGTGGGTGGTAAATCCATCTAAAGCTAAATATTGGCGAGAGACCGATAGCGAACAAGTACAGT<br>GATGGAAGATGAAAAGAACTTTGAAAAGAGAGTGAAGAAAGTACGTGAAATTGTTGAAAGGGAAGGGCATTGATCAGACATGGTGTTCG<br>TGCTTTTGTCTCCTTGTTGGGCGGGGAGACTCACACGGTTCAGTGGCCAAACATCAGTTTTGGCAGCAGGATAAAACCTTGGGAACGTAGCTTT<br>CTTCGGGAAGTATTATAGCCCTTGGAATACTGCTAGCCGGGATTGAGGACTGCGCATTTATGCAAGGATGTTGGCTTAATGGTTAAATGCCG<br>CCCGTCTTGA | 99%  | <i>Saccharomycodes ludwigii</i><br>strain H4S5K10<br>(Gene bank accession No:<br>FM180540.1)<br>(600 nucleotides) |
| SLY-26 | GTAGCGGCGAGTGAGCGGCAGAGCTCAGATTTGAAATCGTGTTCGGCACGAGTTGTAGAGTGTAGGCGGGAGTCTCTGTGGAGCGCGGTG<br>TCCAAGTCCCTTGGAACAGGGTGCCTGAGAGGGTGAGAGCCCCGTAGGGTGCTGCGCGAAGCTTTGAGGCCCTGCTGACGAGTCGAGTTG<br>TTTGGGAATGCAGCTCCAAGCGGGTGGTAAATCCATCTAAGGCTAAATATTGGCGAGAGACCGATAGCGAACAAGTACTGTGAAGGAAAG<br>ATGAAAAGCACTTTGAAAAGAGAGTGAACAGCACGTGAAATTGTTGAAAGGGAAGGGTATTGGGCTCGACATGGGGGGTGCACACCGCT<br>GTCTCTTGTAGGCGGCGCTCTGGGCGCCCTCTGGGCCAGCATCGGTTCTGCTGCGGGAGAAGGGGCTCCGGAAGTGGCTCTTCGGAGTGT<br>TATAGCCGGGGCCAGATGCCGCGTGTGGGGACCGAGGACTGCGGCTTCTGTCTCGGATGCTGGCATAACGGCGCAATACCGCCCGTCTTGA                             | 100% | <i>Pichia manshurica</i> strain<br>SHB_06<br>(Gene bank accession No:<br>KF268292.1)                              |
| SLY-27 | CCAGTAGCGGCGAGTGAGCGGCAGAGCTCAGATTTGAAATCGTGTTCGGCACGAGTTGTAGAGTGTAGGCGGGAGTCTCTGTGGAGCGCG<br>GTGTCCAAGTCCCTTGGAACAGGGTGCCTGAGAGGGTGAGAGCCCCGTAGGGTGCTGCGCGAAGCTTTGAGGCCCTGCTGACGAGTCGAG<br>TTGTTTGGGAATGCAGCTCCAAGCGGGTGGTAAATCCATCTAAGGCTAAATATTGGCGAGAGACCGATAGCGAACAAGTACTGTGAAGGAA<br>AGATGAAAAGCACTTTGAAAAGAGAGTGAACAGCACGTGAAATTGTTGAAAGGGAAGGGTATTGGGCTCGACATGGGGGGTGCACACCG<br>CTGTCTCTTGTAGGCGGCGCTCTGGGCGCCCTCTGGGCCAGCATCGGTTCTGCTGCGGGAGAAGGGGCTCCGGAAGTGGCTCTTCGGAGT<br>GTTATAGCCGGGGCCAGATGCCGCGTGTGGGGACCGAGGACTGCGGCTTCTGTCTCGGATGCTGGCATAACGGCGCAATACCGCCCGTCTTG<br>A                      | 100% | (553 nucleotides)                                                                                                 |
