# Supplementary material
Source: publisher figshare collection journal article supplement (https://tandf.figshare.com/articles/dataset/_/8850992)
Supplement: Supplementary file 1 [file 1 › tbeq_a_1631213_sm8428.pdf]

**Table S2.** Nucleotide differences of SLY-19, SLY-21, SLY-24 and SLY-25 strains by comparing the DNA sequences obtained through the PCR amplification of 26S rDNA D1/D2 region to that of *Pichia manshurica* and *Saccharomyces ludwigii* reference strains.

|        |                             |                                       |
|--------|-----------------------------|---------------------------------------|
| SLY-19 | 21 A deleted                | <i>Pichia manshurica</i> SHB_06       |
|        | 52 C      T                 | Gene bank accession No: KF268292.1    |
|        | 356 G      A                | (553 nucleotides)                     |
| SLY-21 | 21 A      AA (additional A) |                                       |
| SLY-24 | 21 A      AA (additional A) |                                       |
| SLY-25 | 39 A deleted                | <i>Saccharomyces ludwigii</i> H4S5K10 |
|        | 50 A deleted                | Gene bank accession No: FM180540.1    |
|        |                             | (600 nucleotides)                     |
